# Supplementary material for: Bidirectional Interactions between Arboviruses and the Bacterial and Viral Microbiota in Aedes aegypti and Culex quinquefasciatus
Source: PubMed Central journal article supplement (PMC9600335; doi:10.1128/mbio.01021-22), 2022-09-07
Supplement: mbio.01021-22-s0002.pdf [file mbio.01021-22-s0002.pdf]

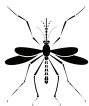

7-day-old adults  
fed with sucrose

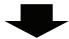

Sucrose

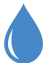

Blood

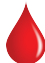

ZIKV/WNV

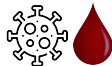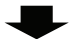

7 & 21 dpe *Ae. aegypti*  
7 & 14 dpe *Cx. quinquefasciatus*

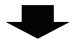

dissection

Head

Body

Plaque assay

qRT-PCR\*

Virome

Bacteriome

qRT-PCR
