# Supplementary material for: Bidirectional Interactions between Arboviruses and the Bacterial and Viral Microbiota in Aedes aegypti and Culex quinquefasciatus
Source: PubMed Central journal article supplement (PMC9600335; doi:10.1128/mbio.01021-22), 2022-09-07

# Alpha diversity of eukaryotic virus in *Ae. aegypti*

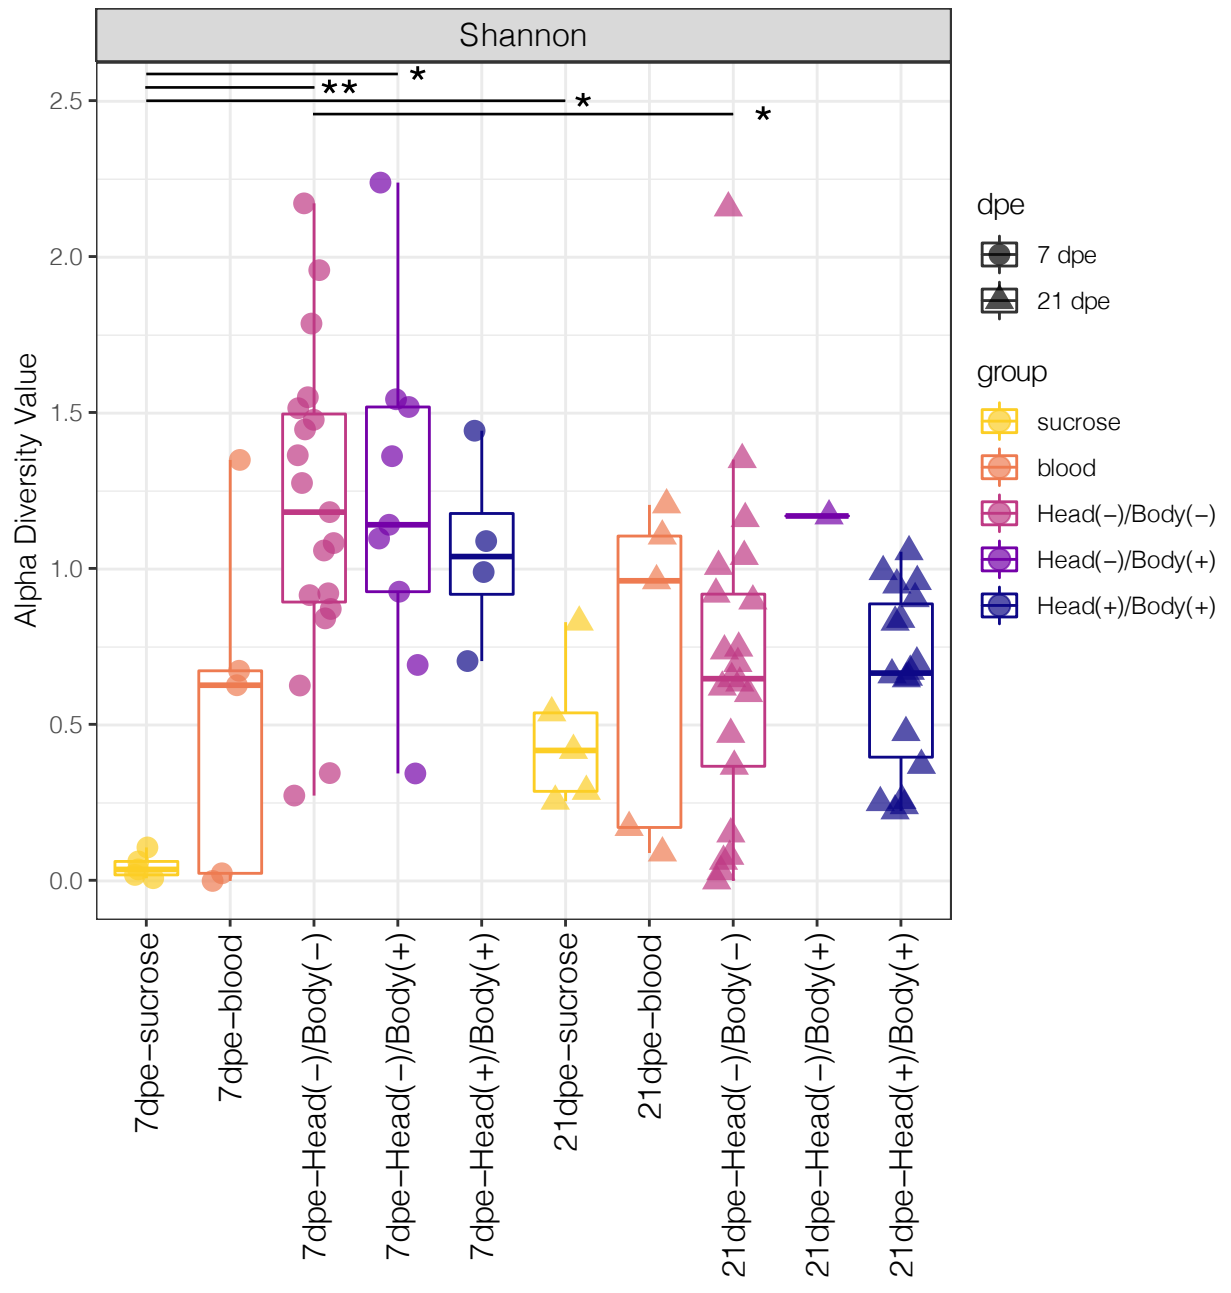

Supplement: mbio.01021-22-s0003.pdf [file mbio.01021-22-s0003.pdf]
