# Supplementary material for: Bidirectional Interactions between Arboviruses and the Bacterial and Viral Microbiota in Aedes aegypti and Culex quinquefasciatus
Source: PubMed Central journal article supplement (PMC9600335; doi:10.1128/mbio.01021-22), 2022-09-07
Supplement: mbio.01021-22-s0004.pdf [file mbio.01021-22-s0004.pdf]

Viral genome copies determined by qRT-PCR

Guadeloupe mosquito virus

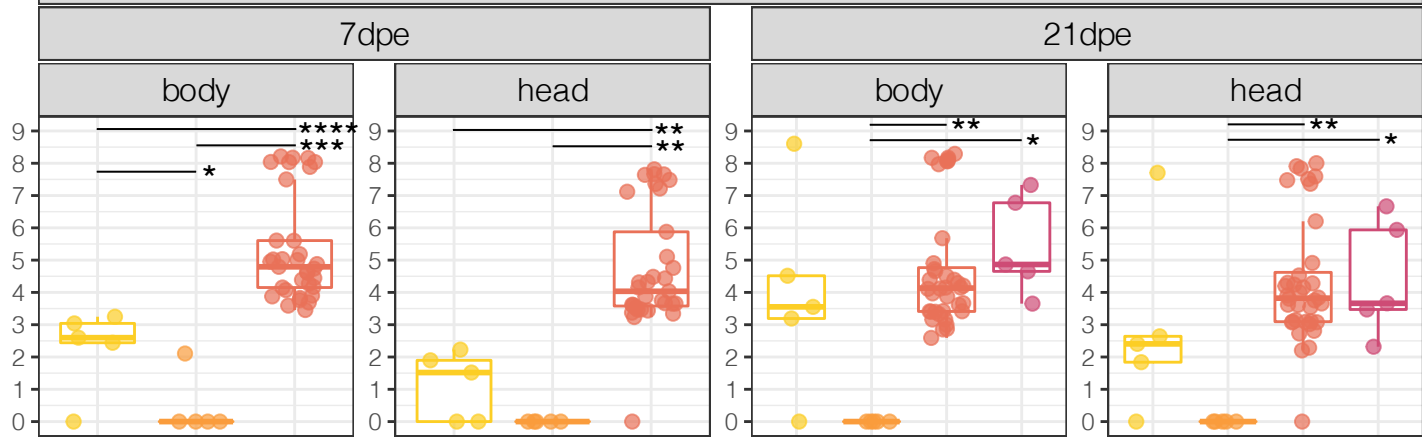

Phasi Charoen-like phasivirus

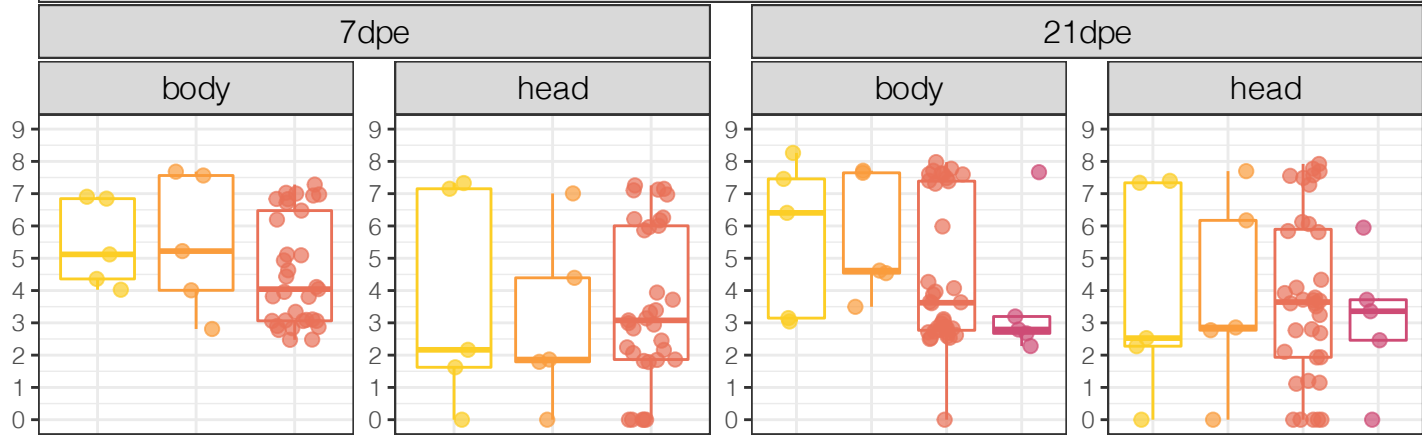

Aedes aegypti totivirus

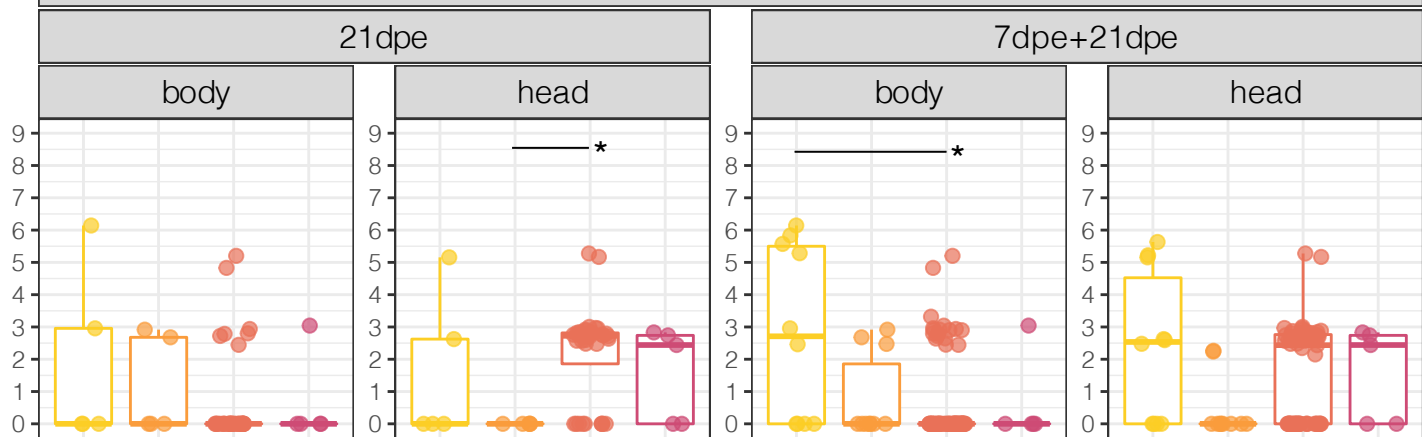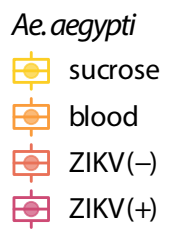

Aedes aegypti anphevirus

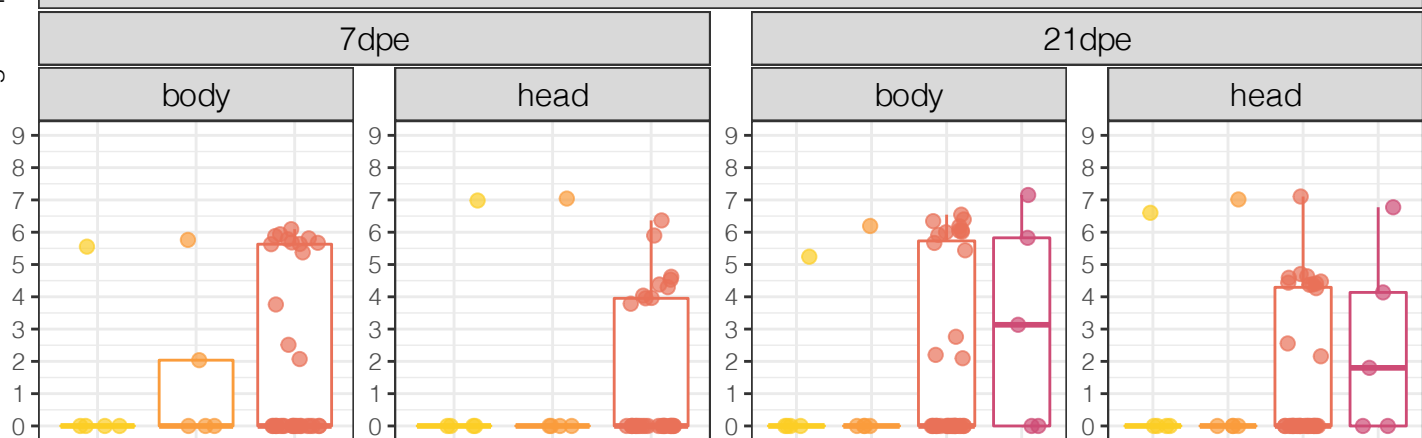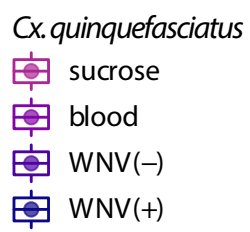

Guadeloupe Culex tymo-like virus

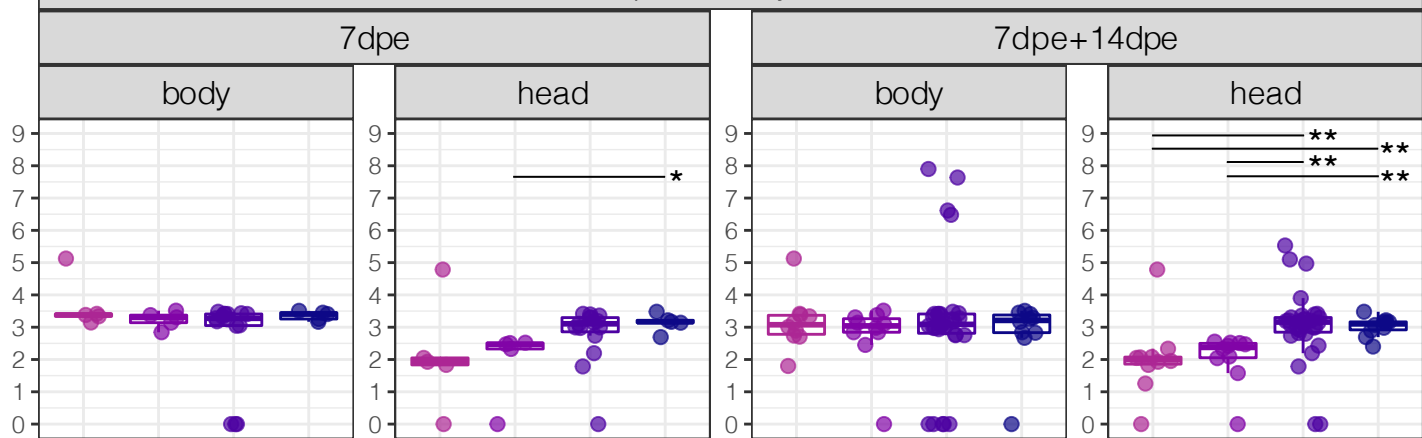

Wenzhou sobemo-like virus 3

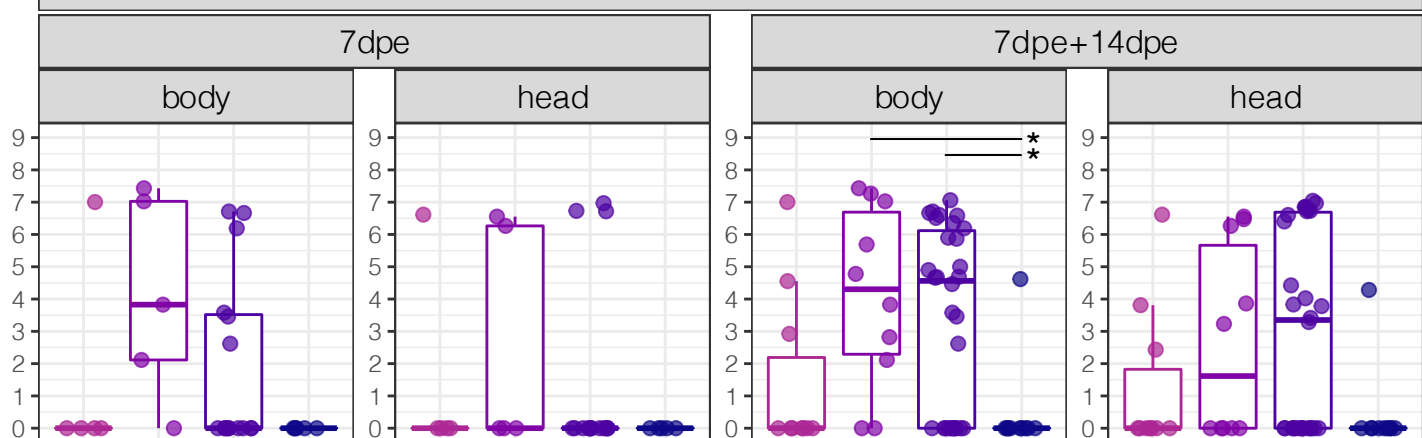

log<sub>10</sub> copies
