# Supplementary material for: Bidirectional Interactions between Arboviruses and the Bacterial and Viral Microbiota in Aedes aegypti and Culex quinquefasciatus
Source: PubMed Central journal article supplement (PMC9600335; doi:10.1128/mbio.01021-22), 2022-09-07
Supplement: mbio.01021-22-s0006.pdf [file mbio.01021-22-s0006.pdf]

a

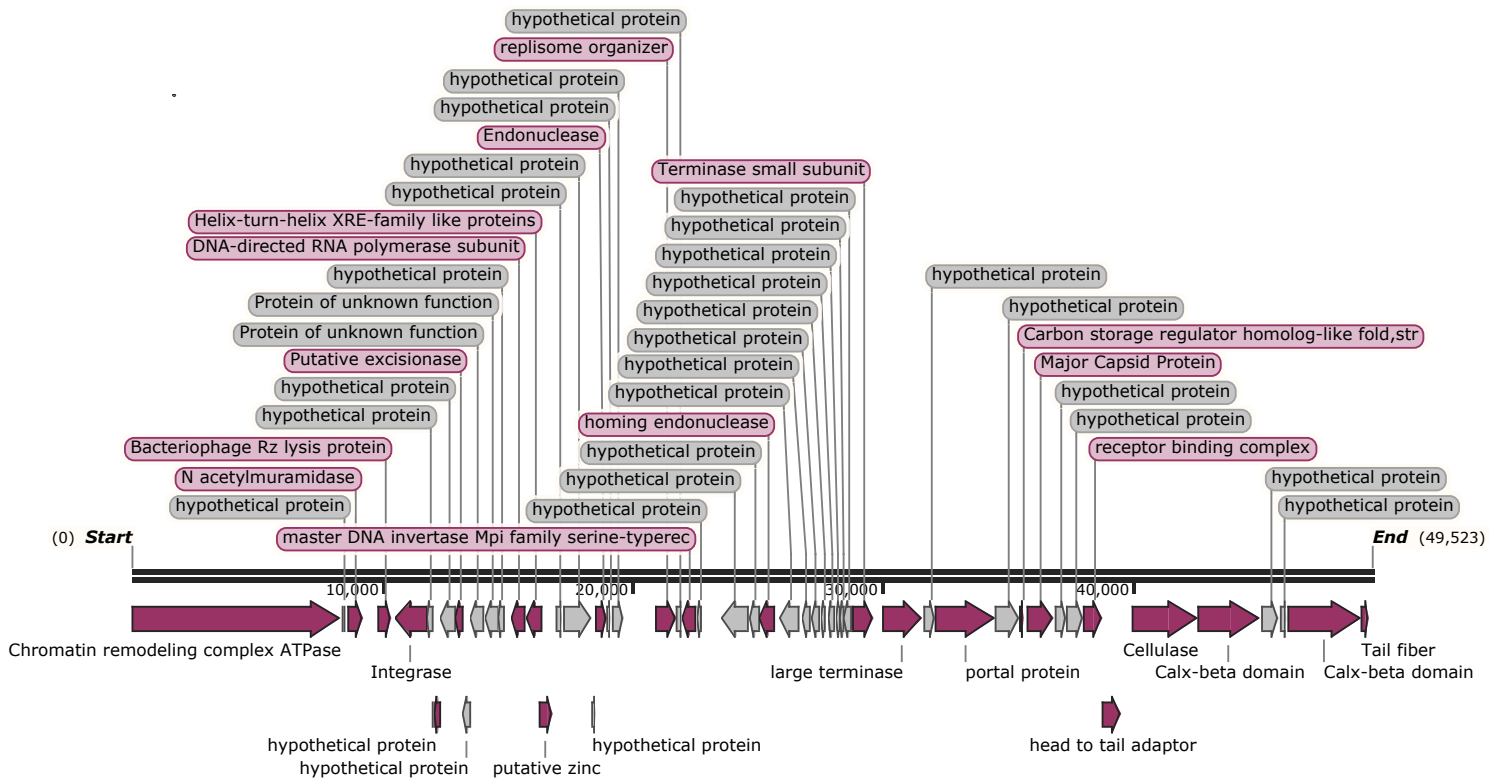

**Phage contig annotated as Podoviridae**  
49,523 bp

b

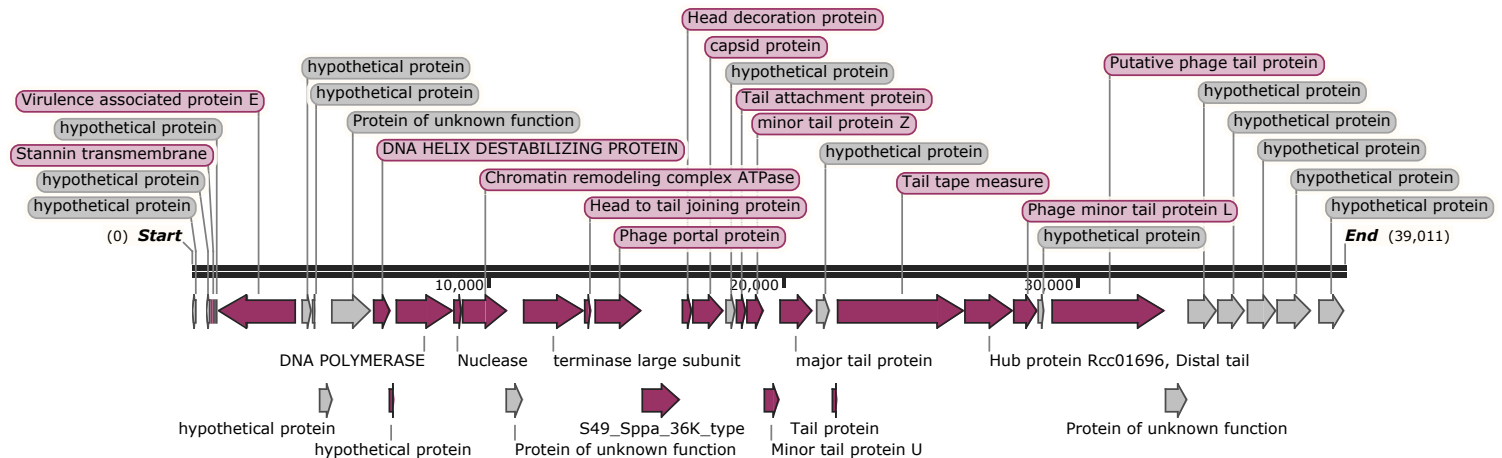

**Phage contig annotated as Siphoviridae**  
39,011 bp
